# Supplementary material
Source: MDPI journal article supplement (https://www.mdpi.com/2071-1050/11/17/4565)
Supplement: s1 [file s1]

Table 1 The Character of the Tested Relationships in Relation to the Research Questions and Detailed Hypotheses.

|        | RQ # 1<br>What is the influence of predictor variables (the presence/absence of trees, the presence/absence of shrubs, effectiveness of concealment, perceived path use intensity) on perceived danger in the countries studied? | RQ # 2<br>Does perceived danger explain the influence of the presence/absence of trees and shrubs as well as perceived path use intensity on preference? |
|--------|----------------------------------------------------------------------------------------------------------------------------------------------------------------------------------------------------------------------------------|----------------------------------------------------------------------------------------------------------------------------------------------------------|
| China  | effectiveness of concealment) / perceived path use intensity → perceived danger (H1a)<br>the presence/absence of trees/shrubs → perceived danger (H1b)                                                                           | the presence/absence of trees/shrubs → perceived danger<br>→ preference (H2)                                                                             |
| Latvia | effectiveness of concealment) / perceived path use intensity → perceived danger (H1a)<br>the presence/absence of trees/shrubs → perceived danger (H1b)                                                                           | perceived path use intensity →<br>perceived danger → preference (H3)                                                                                     |
| Poland | effectiveness of concealment) / perceived path use intensity → perceived danger (H1a)<br>the presence/absence of trees/shrubs → perceived danger (H1b)                                                                           |                                                                                                                                                          |
